# Supplementary material for: Inference of Protein Complex Activities from Chemical-Genetic Profile and Its Applications: Predicting Drug-Target Pathways
Source: PLOS journal article supplement (doi:10.1371/journal.pcbi.1000162), 2008-08-29
Supplement: S1 (10.1371/journal.pcbi.1000162.s001) [file journal.pcbi.1000162.s001]

# Essentiality of genes involved in each protein complex

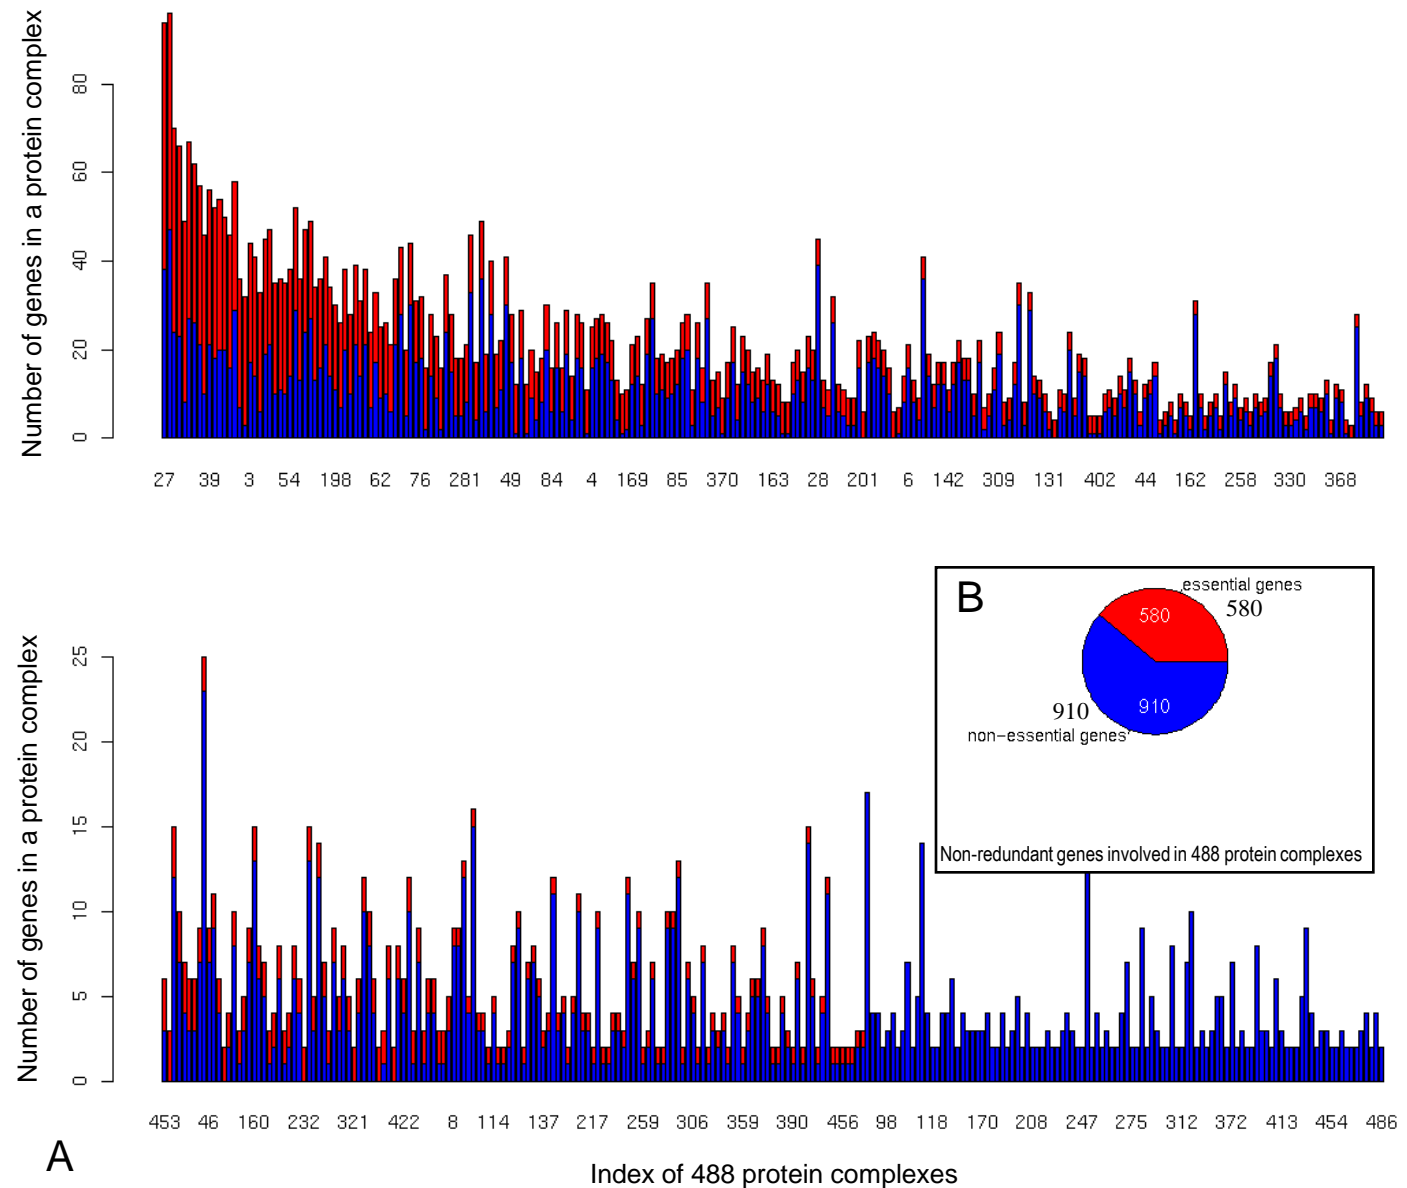

**Figure S1 The distribution of essential and non-essential genes in protein complexes** (A) The distribution of essential and non-essential genes involved in each protein complex is shown. The protein complex is composed of 5.5 essential and 7.8 non-essential genes in average. (B) All of 488 protein complexes include 1490 non-redundant genes, which consist of 580 essential and 910 non-essential genes. In particular, 52 % of 1114 essential genes reported in *Saccharomyces* Genome Deletion project are included in 488 protein complexes.
