# Supplementary material for: Inference of Protein Complex Activities from Chemical-Genetic Profile and Its Applications: Predicting Drug-Target Pathways
Source: PLOS journal article supplement (doi:10.1371/journal.pcbi.1000162), 2008-08-29
Supplement: S6 (10.1371/journal.pcbi.1000162.s006) [file journal.pcbi.1000162.s006]

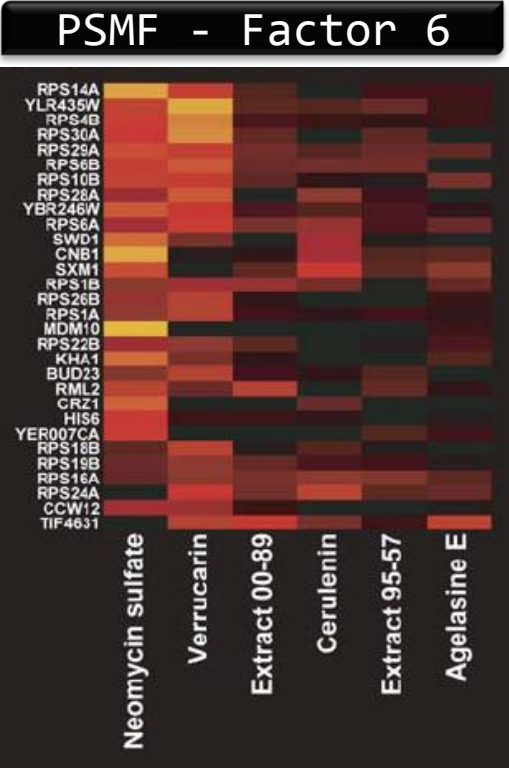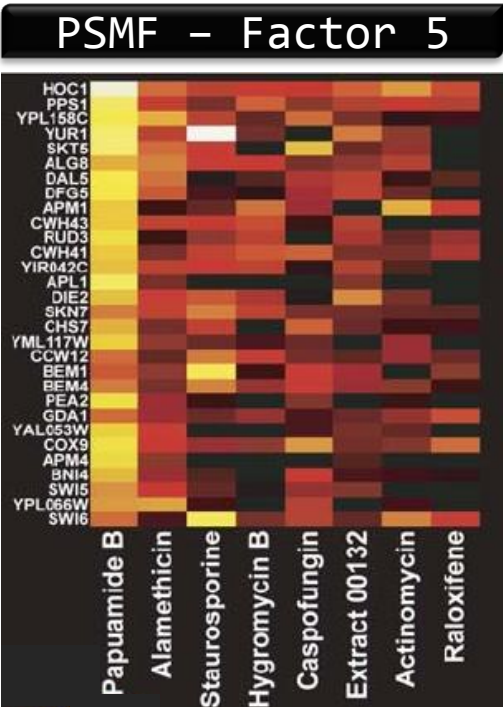

**PC-based clustering**

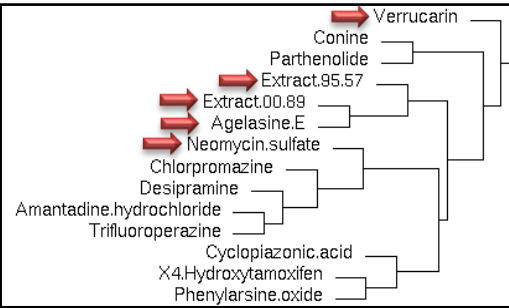

**PC-based clustering**

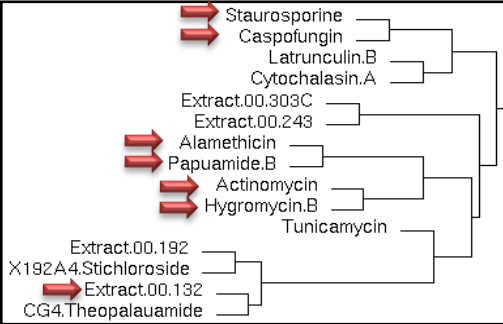

**Strain-based clustering**

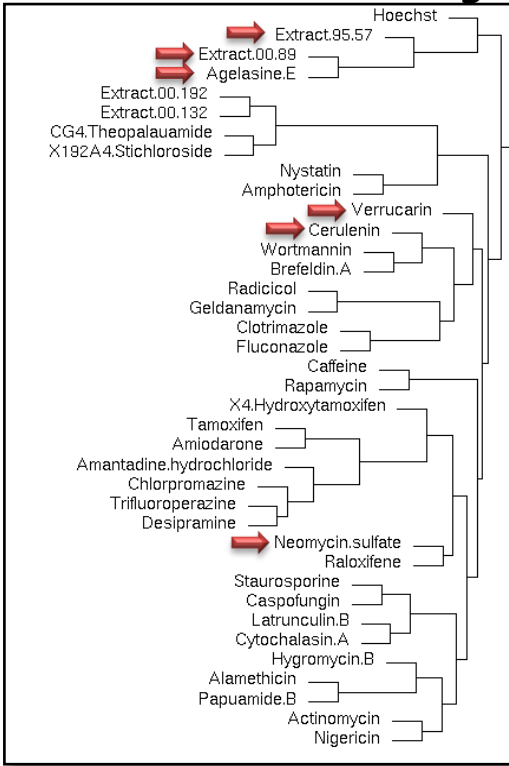

**Strain-based clustering**

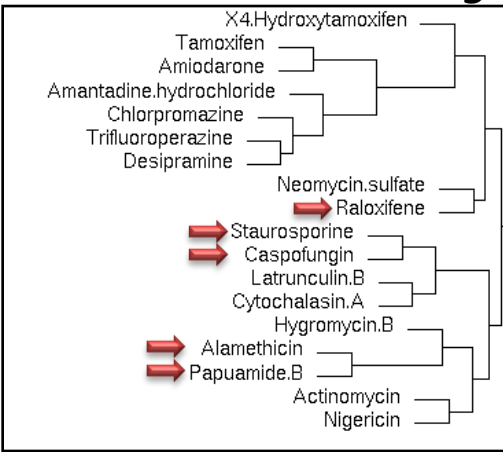

**Figure S6 Comparison of grouping of drugs by probabilistic sparse matrix factorization (PSMF), protein complex (PC)-based hierarchical clustering and strain-base hierarchical clustering.** The red arrow indicates drugs comprising a specific factor obtained by PSMF. (A) Group of drugs comprising factor 6. (B) Group of drugs comprising factor 5. The original factorgram images in the paper by Parsons et al [5] were used in this figure
